# Supplementary material for: The Sano study: justification and detailed description of a multidisciplinary biopsychosocial rehabilitation programme in patients with chronic low back pain
Source: PubMed Central journal article supplement — Clin Rehabil. 2018 Jun 8;32(11):1431–9. doi: 10.1177/0269215518780953 (PMC6204649; doi:10.1177/0269215518780953), 2018-06-08
Supplement: Supplementary_Material.pdf [file Supplementary_Material.pdf]

# 1 Supplemental file

## 2 Activity sheets describing the 38 clinical activities in detail

3 Item 4 (What (procedures)), item 5 (Who provided), item 6 (How), item 8 (When and how much),  
4 and item 9 (Tailoring) from the TIDieR checklist are described for each of the clinical activities.

5 The clinical activities are grouped in ten key components.

### 7 Clinical assessment

|                          |                    |                                                                                                                                                                                                                        |
|--------------------------|--------------------|------------------------------------------------------------------------------------------------------------------------------------------------------------------------------------------------------------------------|
| <b>What (procedures)</b> |                    | <b>Physical assessment</b><br>Anamnesis, individual physical assessment of range of motion, strength, neurology, blood pressure, stethoscopy, registration/adjustment of medication, allergy, alcohol, and/or smoking. |
| <b>Tailoring</b>         |                    | Yes                                                                                                                                                                                                                    |
| <b>Who provided</b>      |                    | Rheumatologist and physiotherapist                                                                                                                                                                                     |
| <b>How</b>               |                    | Individual counselling                                                                                                                                                                                                 |
| <b>When and how much</b> | Number of sessions | 1                                                                                                                                                                                                                      |
|                          | Duration           | 30 minutes                                                                                                                                                                                                             |
|                          | Intensity          | -                                                                                                                                                                                                                      |

8

|                          |                    |                                                                                                                                   |
|--------------------------|--------------------|-----------------------------------------------------------------------------------------------------------------------------------|
| <b>What (procedures)</b> |                    | <b>Psychosocial assessment</b><br>Dialog about individual psychosocial <i>barriers</i> to and <i>facilitators</i> of functioning. |
| <b>Tailoring</b>         |                    | Yes                                                                                                                               |
| <b>Who provided</b>      |                    | Nurses and occupational therapist                                                                                                 |
| <b>How</b>               |                    | A part of the individual nurse and occupational therapist counselling                                                             |
| <b>When and how much</b> | Number of sessions | 2                                                                                                                                 |
|                          | Duration           | 30 minutes                                                                                                                        |
|                          | Intensity          | -                                                                                                                                 |

9

### 10 Motivation and change

|                          |  |                                                                                                 |
|--------------------------|--|-------------------------------------------------------------------------------------------------|
| <b>What (procedures)</b> |  | <b>Instruction in exercise app</b><br>Introduction to the functionalities in the app "MitSano". |
| <b>Tailoring</b>         |  | No                                                                                              |

|                          |                    |                 |
|--------------------------|--------------------|-----------------|
| <b>Who provided</b>      |                    | Physiotherapist |
| <b>How</b>               |                    | Group lecture   |
| <b>When and how much</b> | Number of sessions | 2               |
|                          | Duration           | 30 minutes      |
|                          | Intensity          | -               |

11

|                          |                    |                                                                                                                                                                                                                                                                                                     |
|--------------------------|--------------------|-----------------------------------------------------------------------------------------------------------------------------------------------------------------------------------------------------------------------------------------------------------------------------------------------------|
| <b>What (procedures)</b> |                    | <b>Introduction to rehabilitation</b><br>Knowledge about and insight into how the body, environment and mentality influences the way we live with a disease. Introduction to tools helping them to influence body, environment, and mentality in order to make them cope with their life situation. |
| <b>Tailoring</b>         |                    | No                                                                                                                                                                                                                                                                                                  |
| <b>Who provided</b>      |                    | Occupational therapist                                                                                                                                                                                                                                                                              |
| <b>How</b>               |                    | Group lecture and dialog                                                                                                                                                                                                                                                                            |
| <b>When and how much</b> | Number of sessions | 1                                                                                                                                                                                                                                                                                                   |
|                          | Duration           | 60 minutes                                                                                                                                                                                                                                                                                          |
|                          | Intensity          | -                                                                                                                                                                                                                                                                                                   |

12

|                          |                    |                                                                                                                                                            |
|--------------------------|--------------------|------------------------------------------------------------------------------------------------------------------------------------------------------------|
| <b>What (procedures)</b> |                    | <b>Exercise theory</b><br>Theory/principles for aerobe, anaerobe/strength and mobility exercises. How exercise influences both physical and mental health. |
| <b>Tailoring</b>         |                    | No                                                                                                                                                         |
| <b>Who provided</b>      |                    | Physiotherapist                                                                                                                                            |
| <b>How</b>               |                    | Group lecture and dialog                                                                                                                                   |
| <b>When and how much</b> | Number of sessions | 1                                                                                                                                                          |
|                          | Duration           | 60 minutes                                                                                                                                                 |
|                          | Intensity          | -                                                                                                                                                          |

13

|                          |                    |                                                                                                                                                                                                                                                                          |
|--------------------------|--------------------|--------------------------------------------------------------------------------------------------------------------------------------------------------------------------------------------------------------------------------------------------------------------------|
| <b>What (procedures)</b> |                    | <b>Introduction to mindfulness</b><br>The aim is to develop the participants' ability to be with "what is" without making any judgements or evaluations. The session works towards facilitating the participants' relation to thoughts, feelings, and bodily sensations. |
| <b>Tailoring</b>         |                    | No                                                                                                                                                                                                                                                                       |
| <b>Who provided</b>      |                    | Mindfulness instructor                                                                                                                                                                                                                                                   |
| <b>How</b>               |                    | Group sessions                                                                                                                                                                                                                                                           |
| <b>When and how much</b> | Number of sessions | 1-4                                                                                                                                                                                                                                                                      |
|                          | Duration           | 45-60 minutes                                                                                                                                                                                                                                                            |
|                          | Intensity          | -                                                                                                                                                                                                                                                                        |

14

|                          |                    |                                                                                                                                                                                                                                                                                                                                                  |
|--------------------------|--------------------|--------------------------------------------------------------------------------------------------------------------------------------------------------------------------------------------------------------------------------------------------------------------------------------------------------------------------------------------------|
| <b>What (procedures)</b> |                    | <b>Involvement of relatives</b><br>The aim is to create a common language and understanding among patients and their relatives by educating them in Sano's theoretical approach and individualised focus on treatment. The arrangement compromises knowledge on everyday life strategies, pain knowledge and management and training principles. |
| <b>Tailoring</b>         |                    | No                                                                                                                                                                                                                                                                                                                                               |
| <b>Who provided</b>      |                    | Three providers from the multidisciplinary team                                                                                                                                                                                                                                                                                                  |
| <b>How</b>               |                    | <ul style="list-style-type: none"> <li>- Group session</li> <li>- Possibility to attend treatment sessions, counselling, lectures and diner</li> </ul>                                                                                                                                                                                           |
| <b>When and how much</b> | Number of sessions | 1 group session<br>Unlimited possibility to attend their relatives' everyday life at Sano.                                                                                                                                                                                                                                                       |
|                          | Duration           | 150 minutes                                                                                                                                                                                                                                                                                                                                      |
|                          | Intensity          | -                                                                                                                                                                                                                                                                                                                                                |

15

|                          |                    |                                                                                                                                                                                                                                                  |
|--------------------------|--------------------|--------------------------------------------------------------------------------------------------------------------------------------------------------------------------------------------------------------------------------------------------|
| <b>What (procedures)</b> |                    | <b>Motivation and anchoring</b><br>How to set goals for the future focusing on how to combine everyday life with physical and mental capacity. Insight into the circle of motivation and anchoring as a useful tool in an everyday life setting. |
| <b>Tailoring</b>         |                    | No                                                                                                                                                                                                                                               |
| <b>Who provided</b>      |                    | Nurses                                                                                                                                                                                                                                           |
| <b>How</b>               |                    | Group lecture and dialog                                                                                                                                                                                                                         |
| <b>When and how much</b> | Number of sessions | 1                                                                                                                                                                                                                                                |
|                          | Duration           | 60 minutes                                                                                                                                                                                                                                       |
|                          | Intensity          | -                                                                                                                                                                                                                                                |

16

|                          |                    |                                                                                                                 |
|--------------------------|--------------------|-----------------------------------------------------------------------------------------------------------------|
| <b>What (procedures)</b> |                    | <b>The next step</b><br>How to create a satisfying and meaningful life and still accept the "pain" life brings. |
| <b>Tailoring</b>         |                    | No                                                                                                              |
| <b>Who provided</b>      |                    | Nurses                                                                                                          |
| <b>How</b>               |                    | Group lecture and dialog                                                                                        |
| <b>When and how much</b> | Number of sessions | 1                                                                                                               |
|                          | Duration           | 45 minutes                                                                                                      |
|                          | Intensity          | -                                                                                                               |

17

18 **Pain knowledge and management**

|                          |                    |                                                                                               |
|--------------------------|--------------------|-----------------------------------------------------------------------------------------------|
| <b>What (procedures)</b> |                    | <b>Chronic pain and chronic back pain</b><br>Theory about chronic pain and chronic back pain. |
| <b>Tailoring</b>         |                    | No                                                                                            |
| <b>Who provided</b>      |                    | Rheumatologist                                                                                |
| <b>How</b>               |                    | Group lecture and dialog                                                                      |
| <b>When and how much</b> | Number of sessions | One lecture every fortnight                                                                   |
|                          | Duration           | 60 minutes                                                                                    |
|                          | Intensity          | -                                                                                             |

19

|                          |                    |                                                                                                                                              |
|--------------------------|--------------------|----------------------------------------------------------------------------------------------------------------------------------------------|
| <b>What (procedures)</b> |                    | <b>Experiences with pain</b><br>The patients will gain insight into how pain can influence physical, mental, and social state of well-being. |
| <b>Tailoring</b>         |                    | No                                                                                                                                           |
| <b>Who provided</b>      |                    | Nurses                                                                                                                                       |
| <b>How</b>               |                    | Group lecture and dialog                                                                                                                     |
| <b>When and how much</b> | Number of sessions | 1                                                                                                                                            |
|                          | Duration           | 45 minutes                                                                                                                                   |
|                          | Intensity          | -                                                                                                                                            |

20

|                          |                    |                                                                                                                                                                                                                              |
|--------------------------|--------------------|------------------------------------------------------------------------------------------------------------------------------------------------------------------------------------------------------------------------------|
| <b>What (procedures)</b> |                    | <b>Knowledge about pain</b><br>Understanding pain and mentality.<br>Knowledge about terms such as stimuli, receptors, sensors, alarm system, and sensitization. Histories and metaphors making it easier to understand pain. |
| <b>Tailoring</b>         |                    | No                                                                                                                                                                                                                           |
| <b>Who provided</b>      |                    | Nurses                                                                                                                                                                                                                       |
| <b>How</b>               |                    | Group lecture and dialog                                                                                                                                                                                                     |
| <b>When and how much</b> | Number of sessions | 1                                                                                                                                                                                                                            |
|                          | Duration           | 45 minutes                                                                                                                                                                                                                   |
|                          | Intensity          | -                                                                                                                                                                                                                            |

21

|                          |                    |                                                                                                                                                                                                                                        |
|--------------------------|--------------------|----------------------------------------------------------------------------------------------------------------------------------------------------------------------------------------------------------------------------------------|
| <b>What (procedures)</b> |                    | <b>Knowledge about analgesic medicine</b><br>Introduction to the different groups of analgesic medicine including effects and side effects, in order to see analgesic medicine as a remedy to increase disability and quality of life. |
| <b>Tailoring</b>         |                    | No                                                                                                                                                                                                                                     |
| <b>Who provided</b>      |                    | Nurses                                                                                                                                                                                                                                 |
| <b>How</b>               |                    | Group lecture and dialog                                                                                                                                                                                                               |
| <b>When and how much</b> | Number of sessions | 1                                                                                                                                                                                                                                      |
|                          | Duration           | 45 minutes                                                                                                                                                                                                                             |
|                          | Intensity          | -                                                                                                                                                                                                                                      |

22

|                          |                                                                                                                                                                                                                                                                                                                                                                                                                          |            |
|--------------------------|--------------------------------------------------------------------------------------------------------------------------------------------------------------------------------------------------------------------------------------------------------------------------------------------------------------------------------------------------------------------------------------------------------------------------|------------|
| <b>What (procedures)</b> | <b>Living with pain</b><br>Theoretic class where the patient will gain knowledge about acute and chronic pain, and gain insight into how they actively can change undesirable thoughts and behavior caused by chronic pain, and how to divert thoughts about pain. The patients will be presented to terms such as catastrophizing, stress, energy givers/energy drainers, quality of life, and accept of own situation. |            |
| <b>Tailoring</b>         | No                                                                                                                                                                                                                                                                                                                                                                                                                       |            |
| <b>Who provided</b>      | Nurses                                                                                                                                                                                                                                                                                                                                                                                                                   |            |
| <b>How</b>               | Group lecture and dialog                                                                                                                                                                                                                                                                                                                                                                                                 |            |
| <b>When and how much</b> | Number of sessions                                                                                                                                                                                                                                                                                                                                                                                                       | 1          |
|                          | Duration                                                                                                                                                                                                                                                                                                                                                                                                                 | 60 minutes |
|                          | Intensity                                                                                                                                                                                                                                                                                                                                                                                                                | -          |

23

24 **Multidisciplinary intervention**

|                          |                                                    |     |
|--------------------------|----------------------------------------------------|-----|
| <b>What (procedures)</b> | <b>Welcome meeting</b><br>Introduction and status. |     |
| <b>Tailoring</b>         | No                                                 |     |
| <b>Who provided</b>      | One provider from the multidisciplinary team       |     |
| <b>How</b>               | Group session and dialog                           |     |
| <b>When and how much</b> | Number of sessions                                 | 2-3 |
|                          | Duration                                           | 30  |
|                          | Intensity                                          | -   |

25

|                          |                                                                                                                                                              |            |
|--------------------------|--------------------------------------------------------------------------------------------------------------------------------------------------------------|------------|
| <b>What (procedures)</b> | <b>Multidisciplinary conference</b><br>A patient-centred conference identifying individual self-directed goals and making an individual rehabilitation plan. |            |
| <b>Tailoring</b>         | Yes                                                                                                                                                          |            |
| <b>Who provided</b>      | Two-four providers from the multidisciplinary team                                                                                                           |            |
| <b>How</b>               | Individual counselling                                                                                                                                       |            |
| <b>When and how much</b> | Number of sessions                                                                                                                                           | 1          |
|                          | Duration                                                                                                                                                     | 30 minutes |
|                          | Intensity                                                                                                                                                    | -          |

26

|                          |                                                                                                                                            |
|--------------------------|--------------------------------------------------------------------------------------------------------------------------------------------|
| <b>What (procedures)</b> | <b>Open counselling</b><br>An individually conversation where the patient can ask questions and have his or her exercise program adjusted. |
| <b>Tailoring</b>         | Yes                                                                                                                                        |
| <b>Who provided</b>      | Two providers from the multidisciplinary team                                                                                              |

|                          |                    |                           |
|--------------------------|--------------------|---------------------------|
| <b>How</b>               |                    | Individual counselling    |
| <b>When and how much</b> | Number of sessions | 5 days a week (voluntary) |
|                          | Duration           | 30 minutes                |
|                          | Intensity          | -                         |

27

|                          |                    |                                                                                                                               |
|--------------------------|--------------------|-------------------------------------------------------------------------------------------------------------------------------|
| <b>What (procedures)</b> |                    | <b>Midterm evaluation</b><br>Evaluation of individual self-directed goals and revision of the individual rehabilitation plan. |
| <b>Tailoring</b>         |                    | Yes                                                                                                                           |
| <b>Who provided</b>      |                    | One provider from the multidisciplinary team                                                                                  |
| <b>How</b>               |                    | Individual counselling                                                                                                        |
| <b>When and how much</b> | Number of sessions | 1                                                                                                                             |
|                          | Duration           | 30 minutes                                                                                                                    |
|                          | Intensity          | -                                                                                                                             |

28

29 **Exercise and physical activity**

|                          |                    |                                                                                                                         |
|--------------------------|--------------------|-------------------------------------------------------------------------------------------------------------------------|
| <b>What (procedures)</b> |                    | <b>Aqua gymnastic</b><br>Aerobe and anaerobe exercises as well as exercises focusing on mobility and stability/balance. |
| <b>Tailoring</b>         |                    | The exercises are chosen and adjusted based on the individual patient.                                                  |
| <b>Who provided</b>      |                    | Physiotherapist                                                                                                         |
| <b>How</b>               |                    | Group session                                                                                                           |
| <b>When and how much</b> | Number of sessions | Supervised: 4 sessions<br>Non-supervised: 6 sessions                                                                    |
|                          | Duration           | 30 minutes incl. warm-up and cool-down                                                                                  |
|                          | Intensity          | Borg 11-15                                                                                                              |

30

|                          |                    |                                                                                                                                                          |
|--------------------------|--------------------|----------------------------------------------------------------------------------------------------------------------------------------------------------|
| <b>What (procedures)</b> |                    | <b>Circuit training</b><br>Aerobe and anaerobe exercises of the whole body using elastics, weights, balls, trampoline, step benches, and exercise bikes. |
| <b>Tailoring</b>         |                    | The exercises are chosen and adjusted based on the individual patient.                                                                                   |
| <b>Who provided</b>      |                    | Physiotherapist                                                                                                                                          |
| <b>How</b>               |                    | Group session                                                                                                                                            |
| <b>When and how much</b> | Number of sessions | Supervised: 3-5 sessions<br>Non-supervised: 6-9 sessions                                                                                                 |
|                          | Duration           | 30 minutes incl. warm-up and cool-down                                                                                                                   |
|                          | Intensity          | Borg 14-17                                                                                                                                               |

31

|                          |                               |
|--------------------------|-------------------------------|
| <b>What (procedures)</b> | <b>Intro electric bicycle</b> |
|--------------------------|-------------------------------|

|                          |                    |                                                                 |
|--------------------------|--------------------|-----------------------------------------------------------------|
|                          |                    | Outdoor introduction to electric bicycles that can be borrowed. |
| <b>Tailoring</b>         |                    | Yes                                                             |
| <b>Who provided</b>      |                    | Physiotherapist                                                 |
| <b>How</b>               |                    | Group session                                                   |
| <b>When and how much</b> | Number of sessions | 1 (voluntary)                                                   |
|                          | Duration           | 30 minutes incl. warm-up and cool-down                          |
|                          | Intensity          | Borg 11-15                                                      |

32

|                          |                    |                                                                                                                                      |
|--------------------------|--------------------|--------------------------------------------------------------------------------------------------------------------------------------|
| <b>What (procedures)</b> |                    | <b>Exercise capacity training</b><br>The focus is on increasing exercise capacity (Vo2max) using spinning bicycles and step benches. |
| <b>Tailoring</b>         |                    | The exercises are chosen and adjusted based on the individual patient.                                                               |
| <b>Who provided</b>      |                    | Physiotherapist                                                                                                                      |
| <b>How</b>               |                    | Group session                                                                                                                        |
| <b>When and how much</b> | Number of sessions | 2-3                                                                                                                                  |
|                          | Duration           | 30 minutes incl. warm-up and cool-down                                                                                               |
|                          | Intensity          | Borg 16-17                                                                                                                           |

33

|                          |                    |                                                                                                                                                                                                                                                     |
|--------------------------|--------------------|-----------------------------------------------------------------------------------------------------------------------------------------------------------------------------------------------------------------------------------------------------|
| <b>What (procedures)</b> |                    | <b>Healthy feet</b><br>Warm up, strength- and mobility exercises with small gymnastic balls in different postures. Provide knowledge about different foot types, how to choose appropriate footwear, and how to provide adequate care for the feet. |
| <b>Tailoring</b>         |                    | No                                                                                                                                                                                                                                                  |
|                          |                    |                                                                                                                                                                                                                                                     |
| <b>Who provided</b>      |                    | Physiotherapist                                                                                                                                                                                                                                     |
| <b>How</b>               |                    | Group session                                                                                                                                                                                                                                       |
| <b>When and how much</b> | Number of sessions | 2 (individually referred)                                                                                                                                                                                                                           |
|                          | Duration           | 30 minutes                                                                                                                                                                                                                                          |
|                          | Intensity          | Borg 7-10                                                                                                                                                                                                                                           |

34

|                          |                    |                                                             |
|--------------------------|--------------------|-------------------------------------------------------------|
| <b>What (procedures)</b> |                    | <b>Closing activity</b><br>Relaxation activity and goodbye. |
| <b>Tailoring</b>         |                    | No                                                          |
| <b>Who provided</b>      |                    | Physiotherapist                                             |
| <b>How</b>               |                    | Group session                                               |
| <b>When and how much</b> | Number of sessions | 1                                                           |
|                          | Duration           | 45 minutes                                                  |
|                          | Intensity          | -                                                           |

35

36 **Individual counselling**

|                          |                    |                                                                                                                                                                          |
|--------------------------|--------------------|--------------------------------------------------------------------------------------------------------------------------------------------------------------------------|
| <b>What (procedures)</b> |                    | <b>Individual nurse counselling</b><br>The counselling will be based on the patient's experiences and challenges motivating and supporting them to empower their future. |
| <b>Tailoring</b>         |                    | Yes                                                                                                                                                                      |
| <b>Who provided</b>      |                    | Nurses                                                                                                                                                                   |
| <b>How</b>               |                    | Individual counselling                                                                                                                                                   |
| <b>When and how much</b> | Number of sessions | 4-6                                                                                                                                                                      |
|                          | Duration           | 30-45 minutes                                                                                                                                                            |
|                          | Intensity          | -                                                                                                                                                                        |

37

|                          |                    |                                                                                                                                     |
|--------------------------|--------------------|-------------------------------------------------------------------------------------------------------------------------------------|
| <b>What (procedures)</b> |                    | <b>Individual physiotherapy counselling</b><br>Instruction in exercise programs and continuous progression/regression of exercises. |
| <b>Tailoring</b>         |                    | Yes                                                                                                                                 |
| <b>Who provided</b>      |                    | Physiotherapist                                                                                                                     |
| <b>How</b>               |                    | Individual counselling                                                                                                              |
| <b>When and how much</b> | Number of sessions | 6-9                                                                                                                                 |
|                          | Duration           | 20-30 minutes                                                                                                                       |
|                          | Intensity          | -                                                                                                                                   |

38

|                          |                    |                                                                                                                            |
|--------------------------|--------------------|----------------------------------------------------------------------------------------------------------------------------|
| <b>What (procedures)</b> |                    | <b>Individual occupational therapy counselling</b><br>Focus on habits, roles, and routines in the patient's everyday life. |
| <b>Tailoring</b>         |                    | Yes                                                                                                                        |
| <b>Who provided</b>      |                    | Occupational therapy                                                                                                       |
| <b>How</b>               |                    | Individual counselling                                                                                                     |
| <b>When and how much</b> | Number of sessions | 4                                                                                                                          |
|                          | Duration           | 30-45 minutes                                                                                                              |
|                          | Intensity          | -                                                                                                                          |

39

|                          |                    |                                                                                                                                                 |
|--------------------------|--------------------|-------------------------------------------------------------------------------------------------------------------------------------------------|
| <b>What (procedures)</b> |                    | <b>Individual dietary counselling</b><br>Includes e.g. weight loss or weight gain strategies, irritable bowel syndrome, food intolerances, etc. |
| <b>Tailoring</b>         |                    | Yes                                                                                                                                             |
| <b>Who provided</b>      |                    | Nutritional counsellor                                                                                                                          |
| <b>How</b>               |                    | Individual counselling                                                                                                                          |
| <b>When and how much</b> | Number of sessions | 2-4 (individually referred)                                                                                                                     |
|                          | Duration           | 45-60 minutes                                                                                                                                   |
|                          | Intensity          | -                                                                                                                                               |

40

|                          |  |                                             |
|--------------------------|--|---------------------------------------------|
| <b>What (procedures)</b> |  | <b>Individual rheumatologic counselling</b> |
|--------------------------|--|---------------------------------------------|

|                          |                    |                                                                                                                                             |
|--------------------------|--------------------|---------------------------------------------------------------------------------------------------------------------------------------------|
|                          |                    | Includes e.g. disease pathology and etiology, disease management at any level, medication, physical examination, joint- or bursa-injection. |
| <b>Tailoring</b>         |                    | Yes                                                                                                                                         |
| <b>Who provided</b>      |                    | Rheumatologist                                                                                                                              |
| <b>How</b>               |                    | Individual counselling                                                                                                                      |
| <b>When and how much</b> | Number of sessions | 0-2 (individually referred)                                                                                                                 |
|                          | Duration           | 15-30 minutes                                                                                                                               |
|                          | Intensity          | -                                                                                                                                           |

41

42

**Essential activity**

|                          |                    |                                                                                                                                                                                                                                                                                                                                                                                                                                          |
|--------------------------|--------------------|------------------------------------------------------------------------------------------------------------------------------------------------------------------------------------------------------------------------------------------------------------------------------------------------------------------------------------------------------------------------------------------------------------------------------------------|
| <b>What (procedures)</b> |                    | <b>Activity and health</b><br>The patients will gain knowledge about and learn to understand the connection between activity and health. The patients will gain insight into how their engagement in meaningful activities in their everyday life influences their physical and mental wellbeing. The patients are introduced to the dimensions of activity and how they can use problem solving in performing everyday life activities. |
| <b>Tailoring</b>         |                    | No                                                                                                                                                                                                                                                                                                                                                                                                                                       |
| <b>Who provided</b>      |                    | Occupational therapist                                                                                                                                                                                                                                                                                                                                                                                                                   |
| <b>How</b>               |                    | Group lecture and dialog                                                                                                                                                                                                                                                                                                                                                                                                                 |
| <b>When and how much</b> | Number of sessions | 1                                                                                                                                                                                                                                                                                                                                                                                                                                        |
|                          | Duration           | 60 minutes                                                                                                                                                                                                                                                                                                                                                                                                                               |
|                          | Intensity          | -                                                                                                                                                                                                                                                                                                                                                                                                                                        |

43

|                          |                    |                                                                                                                                                                                                                                                                           |
|--------------------------|--------------------|---------------------------------------------------------------------------------------------------------------------------------------------------------------------------------------------------------------------------------------------------------------------------|
| <b>What (procedures)</b> |                    | <b>Balanced activity</b><br>Knowledge about how, in a desirable way, to organise and priorities activities and energy in everyday life situations. Knowledge about diversities in activities and discussion about how to create equilibrium between duty and inclination. |
| <b>Tailoring</b>         |                    | No                                                                                                                                                                                                                                                                        |
| <b>Who provided</b>      |                    | Occupational therapist                                                                                                                                                                                                                                                    |
| <b>How</b>               |                    | Group lecture and dialog                                                                                                                                                                                                                                                  |
| <b>When and how much</b> | Number of sessions | 1                                                                                                                                                                                                                                                                         |
|                          | Duration           | 60 minutes                                                                                                                                                                                                                                                                |
|                          | Intensity          | -                                                                                                                                                                                                                                                                         |

44

45

46

|                          |  |                                      |
|--------------------------|--|--------------------------------------|
| <b>What (procedures)</b> |  | <b>Activity and social relations</b> |
|--------------------------|--|--------------------------------------|

|                          |                    |                                                                                                                                                                                                                           |
|--------------------------|--------------------|---------------------------------------------------------------------------------------------------------------------------------------------------------------------------------------------------------------------------|
|                          |                    | Dialog concerning how social relations affect health and everyday life activities. The patients prepare a social activity together where their newly acquired skills on problem solving according to activities are used. |
| <b>Tailoring</b>         |                    | Yes                                                                                                                                                                                                                       |
| <b>Who provided</b>      |                    | Occupational therapist                                                                                                                                                                                                    |
| <b>How</b>               |                    | Group lecture and dialog                                                                                                                                                                                                  |
| <b>When and how much</b> | Number of sessions | 1                                                                                                                                                                                                                         |
|                          | Duration           | 60 minutes                                                                                                                                                                                                                |
|                          | Intensity          | -                                                                                                                                                                                                                         |

47

|                          |                    |                                                                                             |
|--------------------------|--------------------|---------------------------------------------------------------------------------------------|
| <b>What (procedures)</b> |                    | <b>Lifelong activity</b><br>How to maintain the process with gaining activities as desired. |
| <b>Tailoring</b>         |                    | No                                                                                          |
| <b>Who provided</b>      |                    | Occupational therapist                                                                      |
| <b>How</b>               |                    | Group lecture and dialog                                                                    |
| <b>When and how much</b> | Number of sessions | 1                                                                                           |
|                          | Duration           | 60 minutes                                                                                  |
|                          | Intensity          | -                                                                                           |

48

49

### Activities of daily living

|                          |                    |                                                                                                                                                                                                                                                                                                                                                     |
|--------------------------|--------------------|-----------------------------------------------------------------------------------------------------------------------------------------------------------------------------------------------------------------------------------------------------------------------------------------------------------------------------------------------------|
| <b>What (procedures)</b> |                    | <b>Sleep</b><br>Introduction to sleep related problems as for example difficulties falling asleep, unrestful sleep, or waking up early. What is a good night's sleep, how unrestful or the lack of sleep can affect physical and mental health, what can be done to obtain a better night's sleep, and the principles for a good sleeping position. |
| <b>Tailoring</b>         |                    | Yes                                                                                                                                                                                                                                                                                                                                                 |
| <b>Who provided</b>      |                    | Occupational therapist                                                                                                                                                                                                                                                                                                                              |
| <b>How</b>               |                    | Group lecture and dialog                                                                                                                                                                                                                                                                                                                            |
| <b>When and how much</b> | Number of sessions | 1 (individually referred)                                                                                                                                                                                                                                                                                                                           |
|                          | Duration           | 60 minutes                                                                                                                                                                                                                                                                                                                                          |
|                          | Intensity          | -                                                                                                                                                                                                                                                                                                                                                   |

50

|                          |  |                                                                                                                                                   |
|--------------------------|--|---------------------------------------------------------------------------------------------------------------------------------------------------|
| <b>What (procedures)</b> |  | <b>House and garden</b><br>The focus is on the individual patient's disabilities with cleaning, shopping staple goods, gardening, and/or cooking. |
| <b>Tailoring</b>         |  | Yes                                                                                                                                               |
| <b>Who provided</b>      |  | Occupational therapy                                                                                                                              |

|                          |                                                                                               |                           |
|--------------------------|-----------------------------------------------------------------------------------------------|---------------------------|
| <b>How</b>               | A workshop with a combination of theory, exchange of experience and putting it into practice. |                           |
| <b>When and how much</b> | Number of sessions                                                                            | 1 (individually referred) |
|                          | Duration                                                                                      | 60 minutes                |
|                          | Intensity                                                                                     | -                         |

51

52

### **Nutrition and weight loss**

|                          |                                                                                                                                                                                                        |                                   |
|--------------------------|--------------------------------------------------------------------------------------------------------------------------------------------------------------------------------------------------------|-----------------------------------|
| <b>What (procedures)</b> | <b>Permanent weight loss strategies</b><br>Lecture developed by the Danish Health Authority. Focus is on how to start losing weight and how to maintain the weight loss e.g. a result of diet changes. |                                   |
| <b>Tailoring</b>         | No                                                                                                                                                                                                     |                                   |
| <b>Who provided</b>      | Physiotherapist                                                                                                                                                                                        |                                   |
| <b>How</b>               | Group lecture and dialog                                                                                                                                                                               |                                   |
| <b>When and how much</b> | Number of sessions                                                                                                                                                                                     | 1 (only for patients with BMI>25) |
|                          | Duration                                                                                                                                                                                               | 30 minutes                        |
|                          | Intensity                                                                                                                                                                                              | -                                 |

53

|                          |                                                                                                                                                                                                                                                                                           |            |
|--------------------------|-------------------------------------------------------------------------------------------------------------------------------------------------------------------------------------------------------------------------------------------------------------------------------------------|------------|
| <b>What (procedures)</b> | <b>Healthy Lifestyle</b><br>Provided an introduction to macro- and micronutrients. Providing the patients with knowledge on e.g. nutrition recommendations drafted by The National Board of Health concerning e.g. fruits and vegetables, saturated fat, omega-3 fatty acids, sugar, etc. |            |
| <b>Tailoring</b>         | No                                                                                                                                                                                                                                                                                        |            |
| <b>Who provided</b>      | Nutritional counsellor                                                                                                                                                                                                                                                                    |            |
| <b>How</b>               | Group lecture and dialog                                                                                                                                                                                                                                                                  |            |
| <b>When and how much</b> | Number of sessions                                                                                                                                                                                                                                                                        | 1          |
|                          | Duration                                                                                                                                                                                                                                                                                  | 60 minutes |
|                          | Intensity                                                                                                                                                                                                                                                                                 | -          |

54

55

56 **Individual exercise**

|                          |                    |                                                                                                               |
|--------------------------|--------------------|---------------------------------------------------------------------------------------------------------------|
| <b>What (procedures)</b> |                    | <b>Individual exercise</b><br>Unsupervised individual exercise in accordance with physiotherapy instructions. |
| <b>Tailoring</b>         |                    | Yes                                                                                                           |
| <b>Who provided</b>      |                    | -                                                                                                             |
| <b>How</b>               |                    | Individual                                                                                                    |
| <b>When and how much</b> | Number of sessions | 2-3 times a day                                                                                               |
|                          | Duration           | 10-30 minutes                                                                                                 |
|                          | Intensity          | Individual                                                                                                    |

57

58

59

60
